# Supplementary material for: Aluminum storage behavior of anatase TiO2 nanotube arrays in aqueous solution for aluminum ion batteries
Source: Royal Society of Chemistry journal article supplement (doi:10.1039/c2ee22987k), 2012-01-01
Supplement: c2ee22987k.pdf [file c2ee22987k.pdf]

## Aluminum storage behavior of anatase TiO<sub>2</sub> nanotube arrays in aqueous solution for aluminum ion batteries \*\*

S. Liu, J. J. Hu, N. F. Yan, G. L. Pan, G. R. Li, and X. P. Gao

**Preparation and characterization of the TiO<sub>2</sub> nanotube arrays.** The metallic Ti foil (1 cm<sup>2</sup>, 0.20 mm thick, 99.7% purity, Sigma-Aldrich) coupled with a graphite counter electrode was subjected to the potentiostatic anodization under the voltage of 60 V for 30 min at room temperature. The electrolyte is 0.3 wt. % NH<sub>4</sub>F and 2 vol. % water in ethylene glycol. After anodization, the sample was calcined at 450°C for 2 h in air. The TiO<sub>2</sub> nanotube array film after polarizing at -1.2 V (vs. SCE) for 3 min in 1 M aqueous AlCl<sub>3</sub> solution was separated ultrasonically from the Ti substrate to obtain the net weight of TiO<sub>2</sub>. The structure and morphology of the as-prepared sample were detected using X-ray powder diffraction (XRD, Rigaku D/MAX-2500v/pc) operated at 40kV/200mA and scanning electron microscopy (SEM, Hitachi S-4800) with an accelerated voltage of 3.0kV. To avoid the experimental errors arising from the TiO<sub>2</sub> film deformation, the film was tightly fixed on the specimen holder with 502 adhesive glue. X-ray photoelectron spectroscopy (XPS) was conducted in PHI5000 VersaProbe with Mg Ka radiation of 1253.6eV. <sup>27</sup>Al magic-angle spinning nuclear magnetic resonance (MAS NMR, 7.0T) spectroscopy experiment was carried out in a Varian Infinity-plus 300WB installed at Tianjin University.

**Electrochemical performance measurement.** The three electrodes were employed in cyclic voltammetry, electrochemical impedance spectra (IM6ex electrochemical workstation, Zahner) and galvanostatic electrochemical charge-discharge curves (Land, Wuhan). The self-standing TiO<sub>2</sub> nanotube arrays film was used as the work electrode, and the graphite electrode and saturated calomel electrode (SCE) were used as the counter and reference electrodes, respectively. The electrolyte was 1 M aqueous chloride, i.e. AlCl<sub>3</sub>, MgCl<sub>2</sub> and LiCl. The apparent area of the TiO<sub>2</sub> working electrode for CVs is about 0.01 cm<sup>2</sup> after coating epoxy resin on the edge and back of the metallic titanium foil. In the charge-discharge curves, the electrode with total area of 2 cm<sup>2</sup> in both sides was charged for 3 min and discharged to -0.4 V (vs. SCE) at a current density of 4 mA/cm<sup>2</sup>. All the electrochemical tests were performed at ambient temperature. The Al inserted TiO<sub>2</sub> sample was prepared by polarizing the TiO<sub>2</sub> electrode at -1.1 V (vs. SCE) for 5 min in 1 M aqueous AlCl<sub>3</sub>, followed by washing with deionized water and drying in vacuum at ambient temperature. XRD, NMR and XPS tests were also performed for the Al-inserted TiO<sub>2</sub> sample.

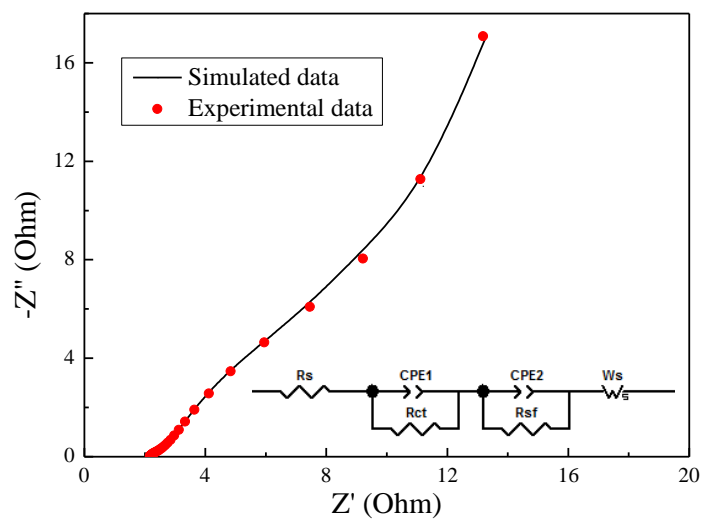

Fig. S1 Electrochemical impedance spectra (EIS) of the  $\text{TiO}_2$  electrode in  $\text{AlCl}_3$  aqueous solution. Inset is the equivalent circuit used to model EIS.

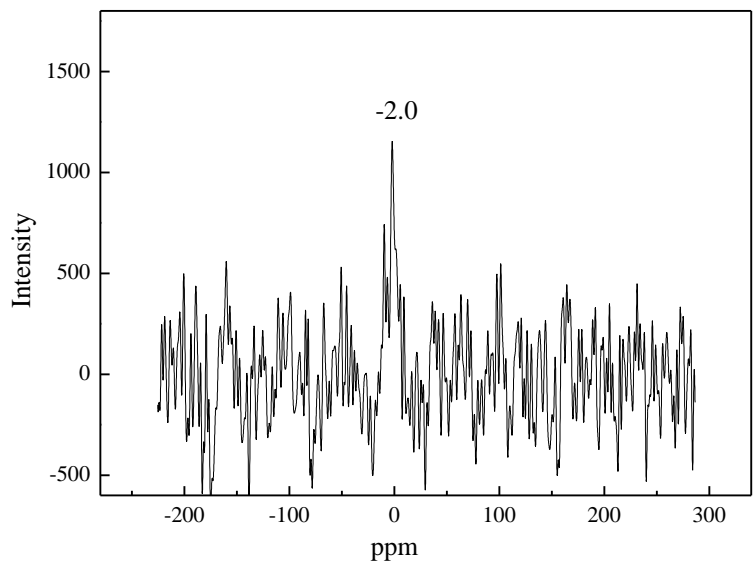

Fig. S2  $^{27}\text{Al}$  MAS NMR spectrum of the Al-inserted  $\text{TiO}_2$  nanotube arrays.

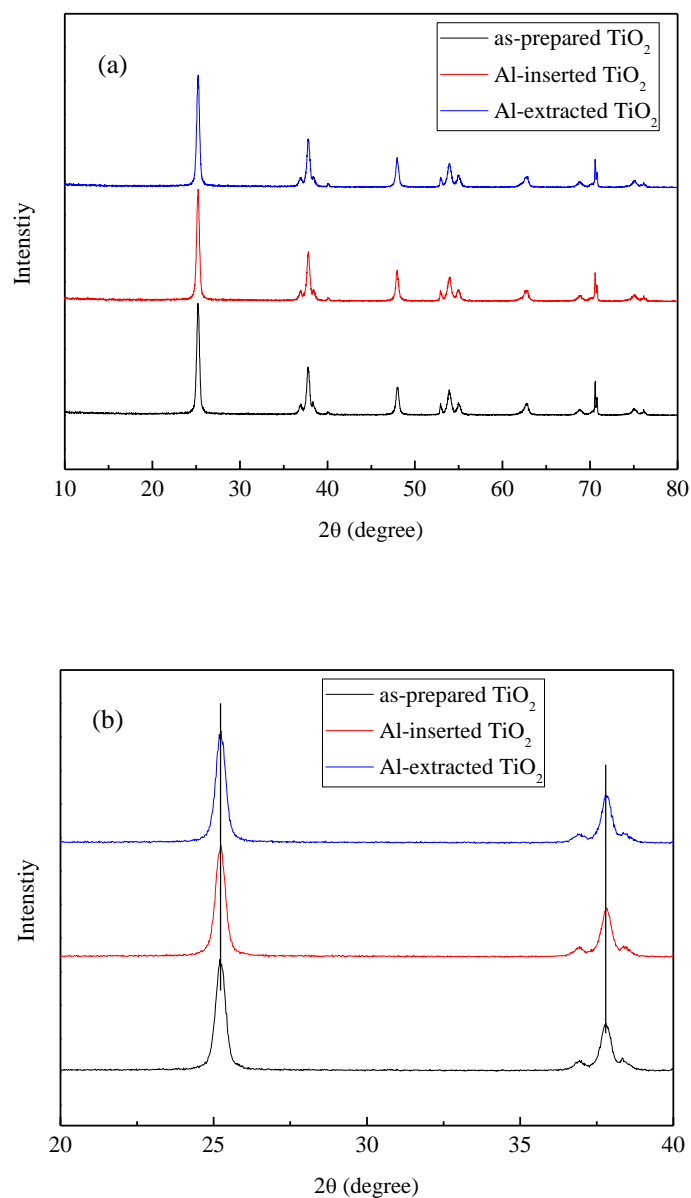

Fig. S3 XRD patterns of the TiO<sub>2</sub> nanotube arrays for all the samples, including the as-prepared, Al-inserted and Al-extracted TiO<sub>2</sub> nanotube array films.
